# Supplementary material for: An Extract of Olive Mill Wastewater Downregulates Growth, Adhesion and Invasion Pathways in Lung Cancer Cells: Involvement of CXCR4
Source: PubMed Central journal article supplement (PMC7231173; doi:10.3390/nu12040903), 2020-03-26
Supplement: nutrients-12-00903-s001.pdf [file nutrients-12-00903-s001.pdf]

**Supplementary Materials:** The following are available online at [www.mdpi.com/xxx/s1](http://www.mdpi.com/xxx/s1), Figure S1: title, Table S1: title, Video S1: title.: The following are available online at [www.mdpi.com/xxx/s1](http://www.mdpi.com/xxx/s1), Figure S1: title, Table S1: title, Video S1: title.

| PHENOLIC COMPOUND                | A009 L1 (g/l) | A009 L2 (g/l) | A009 L3 (g/l) | A009 L4 (g/l) |
|----------------------------------|---------------|---------------|---------------|---------------|
| Hydroxytyrosol glucoside         | ND            | 2.01          | 1.69          | 1.91          |
| Hydroxytyrosol                   | 2.7           | 2.52          | 5.72          | 5.50          |
| Tyrosol                          | 0.2           | 0.80          | ND            | 0.69          |
| Chlorogenic acid                 | 0.12          | 0.10          | 0.10          | 0.13          |
| b-Hydroxyverbascoside isomer 1   | 0.35          | 0.29          | 0.14          | 0.23          |
| b-Hydroxyverbascoside isomer 2   | 0.32          | 0.26          | 0.17          | 0.23          |
| Verbascoside                     | 0.84          | 1.04          | 1.32          | 1.07          |
| Caffeoyl ester of secologanoside | ND            | 0.66          | 0.20          | 0.23          |
| Oleuropein aglycon               | ND            | 0.71          | 0.22          | 0.21          |
| 6'-p-Coumaroyl secologanoside    | ND            | 0.38          | 0.40          | 0.35          |
| Rutin                            | 0.11          | ND            | ND            | ND            |
| Luteolin-7-o-glucoside           | 0.22          | ND            | ND            | ND            |

**Supplementary Table S1. Phenolic compositions in different A009 extracts.** Quantification of the phenolic presence in four different A009 batches (L1, L2, L3, L4) was performed using a high-performance liquid chromatography (HPLC) analysis.

**Representative full chromatogram A009 L3**

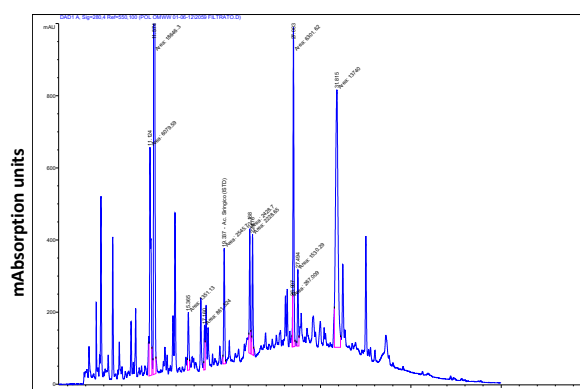

**Representative full chromatogram A009 L4**

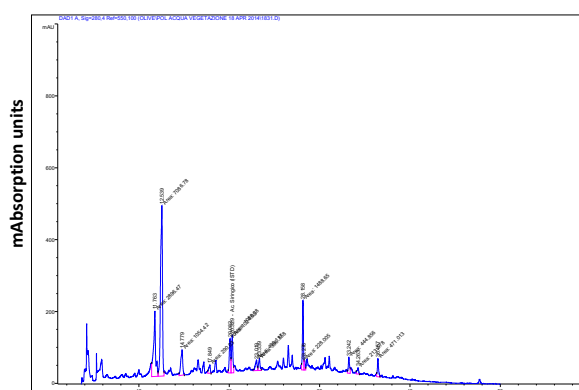

Time (min)

**Supplementary Figure S1. Representative full chromatograms for A009 extracts.** The full chromatograms for two different batches of A009, L3 and L4, are shown.

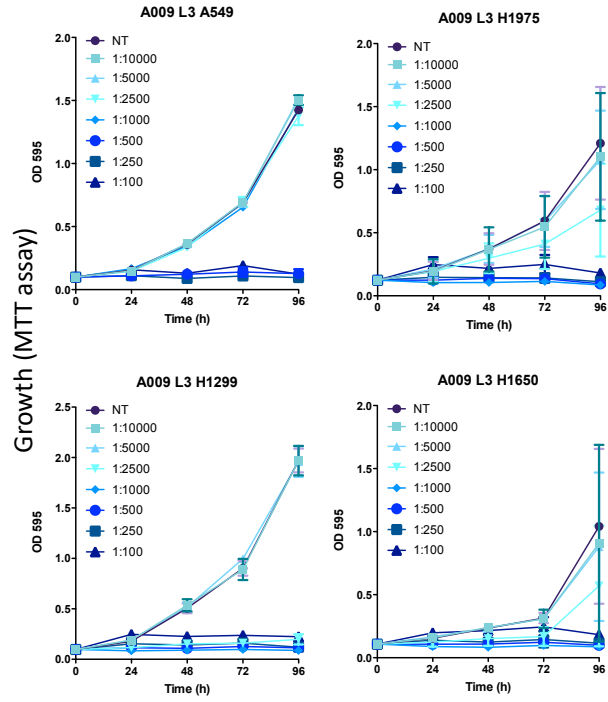

**Supplementary Figure S2. Effect of the A009 extracts on lung cancer cell proliferation *in vitro*.** Lung carcinoma cell lines were treated for 24-48-72-96 hours the A009 extract (L3), at dilution range 1:10000 to 1:50. The effect on cell proliferation was assessed using the MTT colorimetric assay. At each time point the absorbance value at 570 nm was detected. The data are shown as a percentage of proliferating cells, per experimental condition. Results are shown as mean  $\pm$  SEM, two-way ANOVA
